# Supplementary material
Source: PubMed Central journal article supplement (PMC1941763)
Supplement: NIHMS24618-supplement-supplement_1.pdf [file NIHMS24618-supplement-supplement_1.pdf]

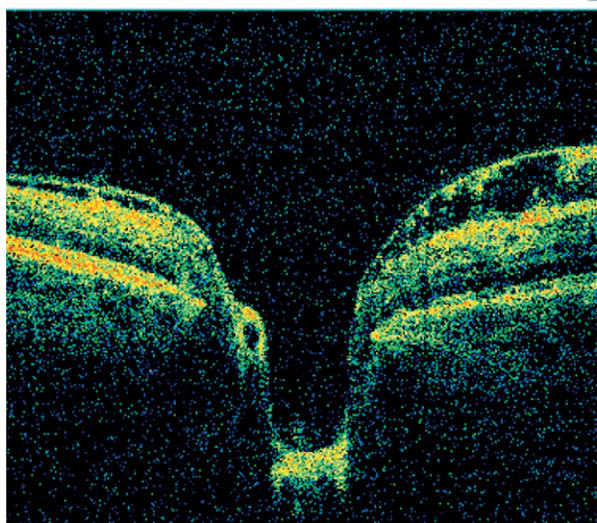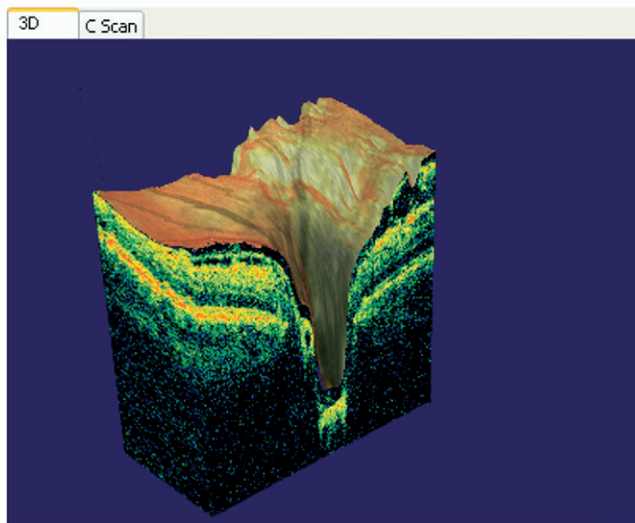

SUPPLEMENTARY FIGURE. High speed high-resolution scan of the left optic nerve showing schisis temporally (Left) and 3D image revealing the schisis extending to the optic nerve head (Right).
